# Supplementary material for: The DEAH-box Helicase Dhr1 Dissociates U3 from the Pre-rRNA to Promote Formation of the Central Pseudoknot
Source: PLoS Biol. 2015 Feb 24;13(2):e1002083. doi: 10.1371/journal.pbio.1002083 (PMC4340053; doi:10.1371/journal.pbio.1002083)
Supplement: S3 Data — Dhr1 ATPase activity. (XLSX) [file pbio.1002083.s003.xlsx]

## Sheet: Sheet1
	Dhr1 no RNA			Dhr1 + Poly(A)			Dhr1 + U3 snoRNA			Dhr1 + Imp3 + Poly(A)			Imp3 + Poly(A)			Dhr1(D516A/E517A) no RNA			Dhr1(D516A/E517A) + Poly(A)			Dhr1(K420A) no RNA			Dhr1(K420A) + Poly(A)			Mock
1	1.005	1.859	2.487
2				8.162	13.54	11.19
3							4.855	10.29	9.922
4										3.089	5.832	5.766
5													0.1164	0.993	0.3968
6																1.672	1.283	0.5171
7																			1.473	0.4908	0.5535
8																						1.738	1.987	1.952
9																									1.206	1.575	1.508
10																												0.3722	0.9535	0.2476
